# Supplementary material for: A highly efficient protocol for transforming Cuscuta reflexa based on artificially induced infection sites
Source: PubMed Central journal article supplement — Plant Direct. 2020 Aug 10;4(8):e00254. doi: 10.1002/pld3.254 (PMC7417715; doi:10.1002/pld3.254), 2020-08-10
Supplement: PLD3-4-e00254-s002.pdf [file PLD3-4-e00254-s002.pdf]

**Supplemental Table S1:** Transformation efficiency in *C. reflexa* shoots when agrobacteria were replaced with sterile tap water containing 400 mg/L Cefotaxime on day 3 of infection structure induction.

| Number of shoots | # infection sites total | # adhesive disks transformed | <i>Agrobacterium</i> strain | Reporter fluorochrome |
|------------------|-------------------------|------------------------------|-----------------------------|-----------------------|
| 4                | 8                       | 0                            | <i>A. rhizogenes</i> MSU440 | dsRed                 |
| 4                | 26                      | 0                            | <i>A. rhizogenes</i> MSU440 | dsRed                 |
| 4                | 25                      | 1                            | <i>A. rhizogenes</i> MSU440 | dsRed                 |
| 4                | 52                      | 6                            | <i>A. rhizogenes</i> MSU440 | dsRed                 |

**Supplemental Table S2:** Transformation efficiency in *C. reflexa* shoots when agrobacteria were added on day 3 of infection structure induction.

| Number of shoots | # infection sites total | # adhesive disks transformed | <i>Agrobacterium</i> strain | Reporter fluorochrome |
|------------------|-------------------------|------------------------------|-----------------------------|-----------------------|
| 4                | 6                       | 6                            | <i>A. rhizogenes</i> MSU440 | dsRed                 |
| 4                | 65                      | 45                           | <i>A. rhizogenes</i> MSU440 | dsRed                 |
| 4                | 23                      | 15                           | <i>A. rhizogenes</i> MSU440 | dsRed                 |
| 4                | 50                      | 18                           | <i>A. rhizogenes</i> MSU440 | dsRed                 |
